# Supplementary material for: Protective Effects of Salvianolic Acid A against Dextran Sodium Sulfate-Induced Acute Colitis in Rats
Source: PubMed Central journal article supplement (PMC6024375; doi:10.3390/nu10060791), 2018-06-19
Supplement: nutrients-10-00791-s001.pdf [file nutrients-10-00791-s001.pdf]

**Supplemental Table 1. Primer Sequences used for qRT-PCR**

| Gene                          | Primer sequence          | Product size (bp) | GenBank accession No. |
|-------------------------------|--------------------------|-------------------|-----------------------|
| <i>GAPDH</i>                  | F: CAAGTTCAACGGCACAGTCA  | 100               | NM_017008.4           |
|                               | R: CCATTTGATGTTAGCGGGAT  |                   |                       |
| <i>IL-1<math>\beta</math></i> | F: CTCGTGCTGTCTGACCCAT   | 247               | NM_031512.2           |
|                               | R: CAAACCGCTTTTCCATCTTC  |                   |                       |
| <i>MCP-1</i>                  | F: AGCAGGTGTCCCAAAGAAGC  | 251               | NM_031530.1           |
|                               | R: ACAGAAGTGCTTGAGGTGGT  |                   |                       |
| <i>IL-6</i>                   | F: TGGAGTTCCGTTTCTACCTG  | 220               | NM_012589             |
|                               | R: TGGATGGTCTTGGTCCTTAG  |                   |                       |
| <i>TGF-<math>\beta</math></i> | F: GGCGGTGCTCGCTTTGTA    | 135               | NM_021578.2           |
|                               | R: ATTGCGTTGTTGCGGTCC    |                   |                       |
| <i>Occludin</i>               | F: AGGCTTCTGGATCTATGTACG | 208               | NM_031329.2           |
|                               | R: ATCTTTCTTCGGGTTTTTAC  |                   |                       |
| <i>ZO-1</i>                   | F: CAGCCCCAGGTAGTGAGT    | 163               | NM_0011062            |
|                               | R: GAGGACCGTGTAATAGCAGA  |                   |                       |

66.1
